# Supplementary material for: Thiourea bridged periodic mesoporous organosilica with ultra-small Pd nanoparticles for coupling reactions
Source: Royal Society of Chemistry journal article supplement (doi:10.1039/c7ra11711f), 2017-01-01
Supplement: c7ra11711f1.pdf [file c7ra11711f1.pdf]

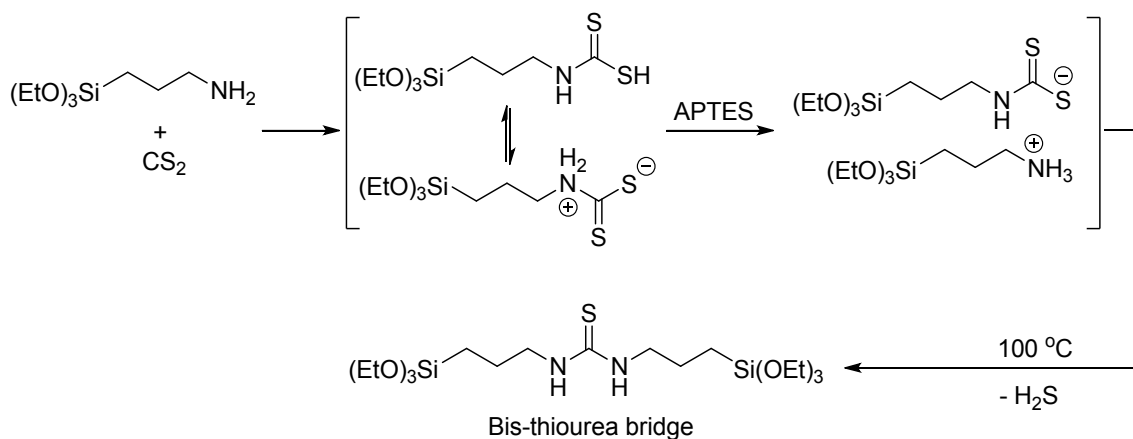

Figure S1 Procedure for synthesis of the bis-thiourea bridge.

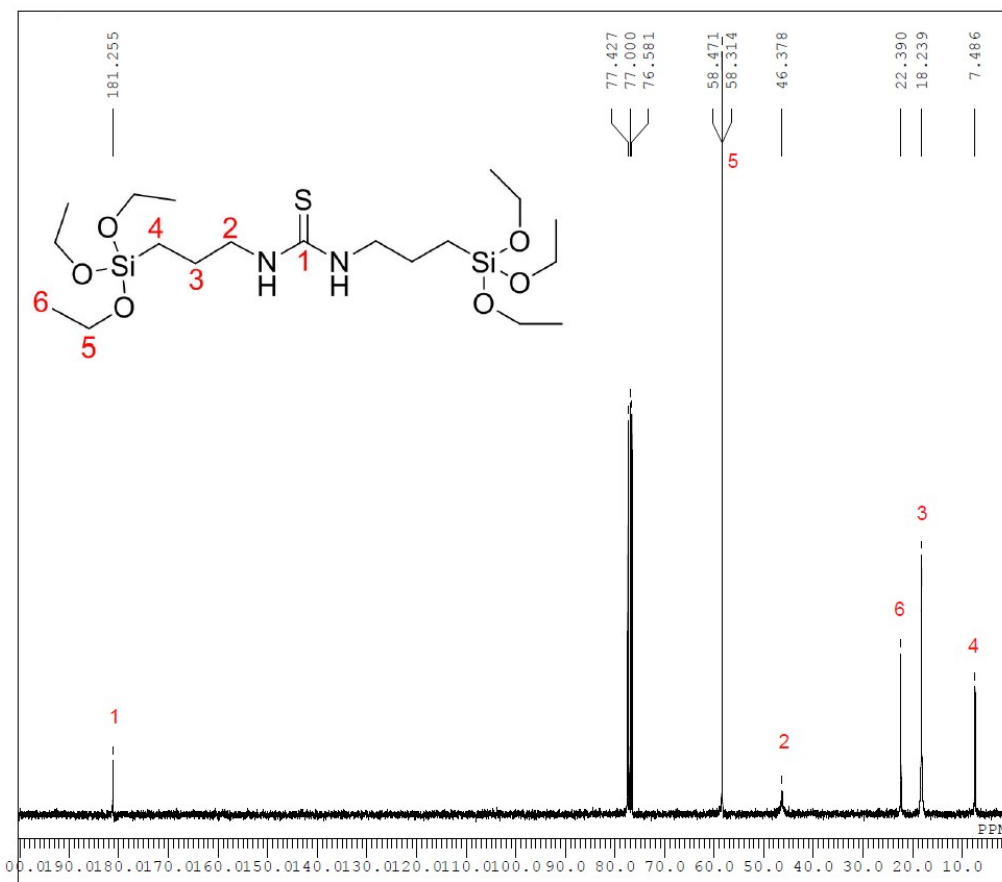

Figure S2  $^{13}\text{C-NMR}$  of the synthesized bis-thiourea bridge.

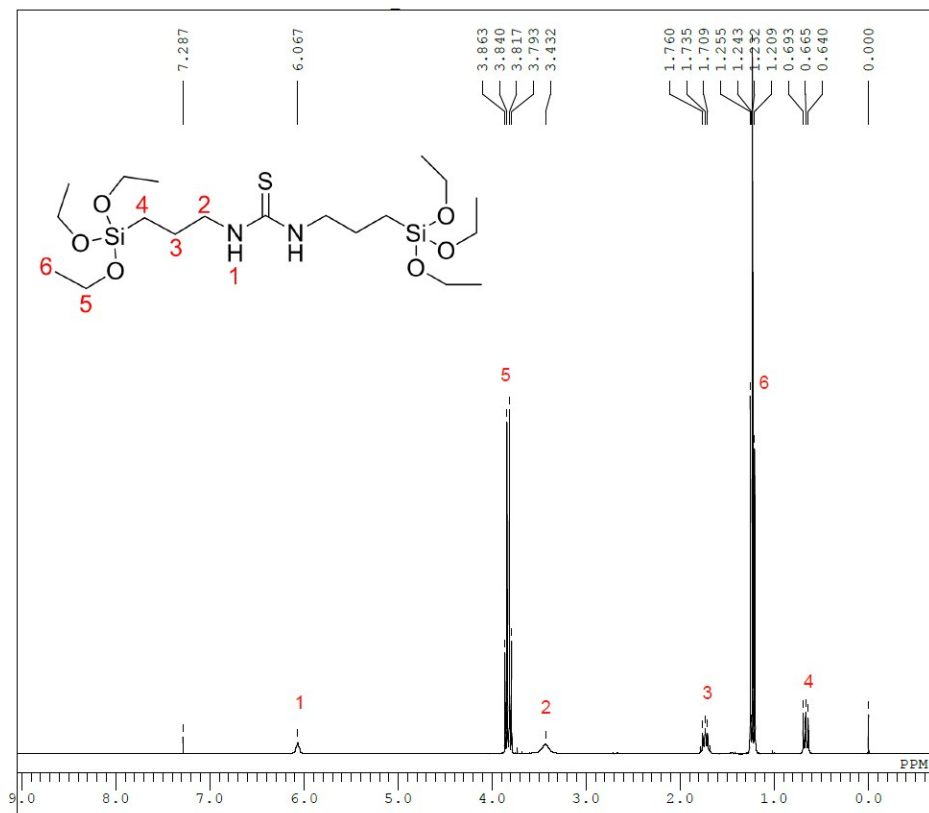

**Figure S3** <sup>1</sup>H-NMR of the synthesized bis-thiourea bridge.

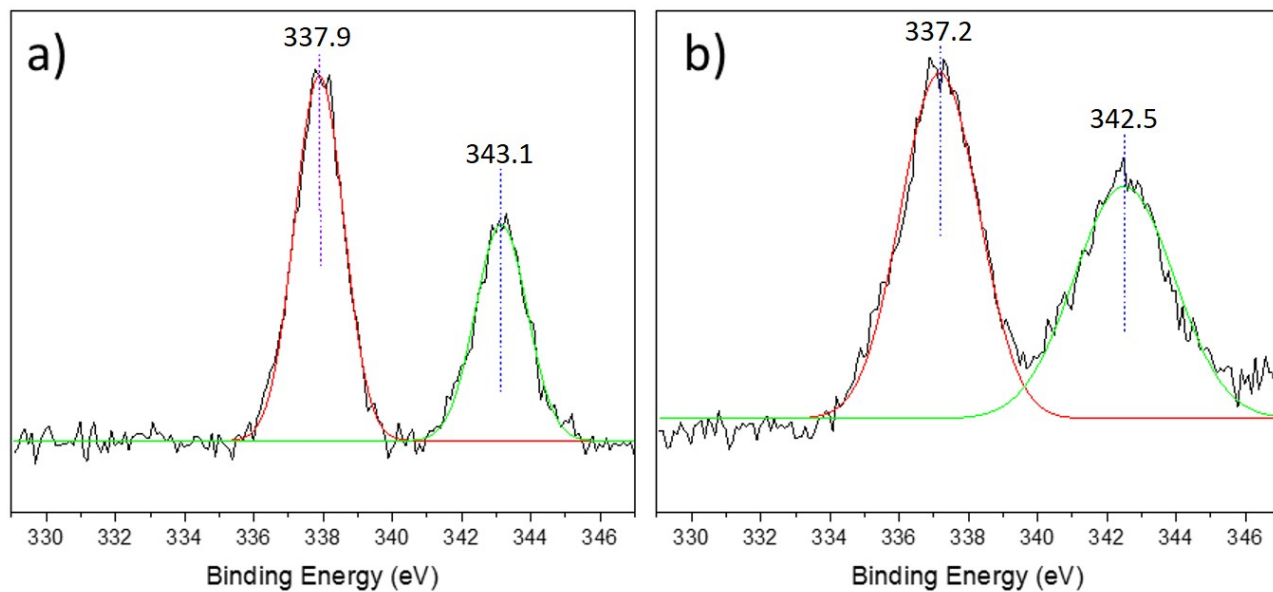

**Figure S4** XPS spectra of (a) Pd<sup>2+</sup>@TU-PMO and (b) Pd@TU-PMO after reduction with NaBH<sub>4</sub>.

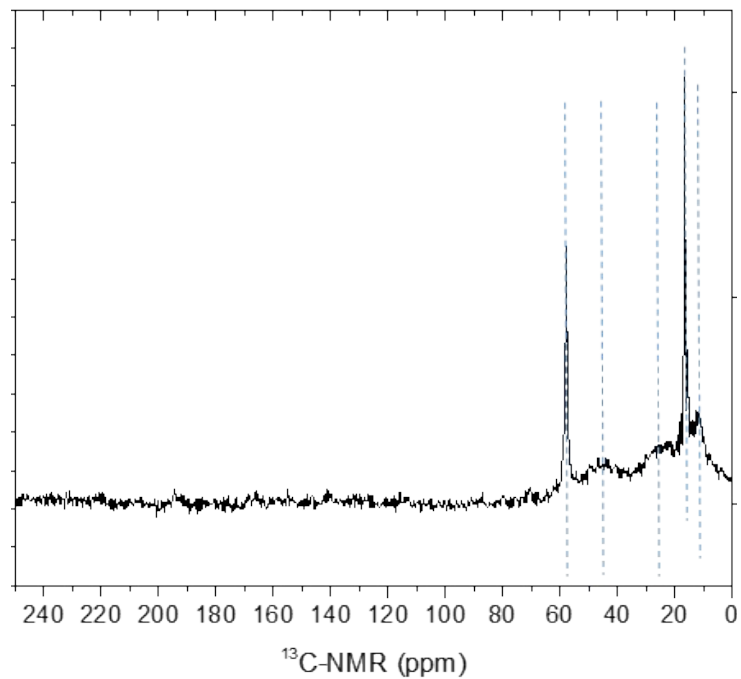

**Figure S5** Solid state  $^{13}\text{C}$ -NMR spectrum of TU-PMO. The peaks at 11.6, 16.8, 25.4, 45.0, and 57.9 ppm can be assigned to the organic structure of bis-thiourea which is preserved after embedment in TU-PMO structure.

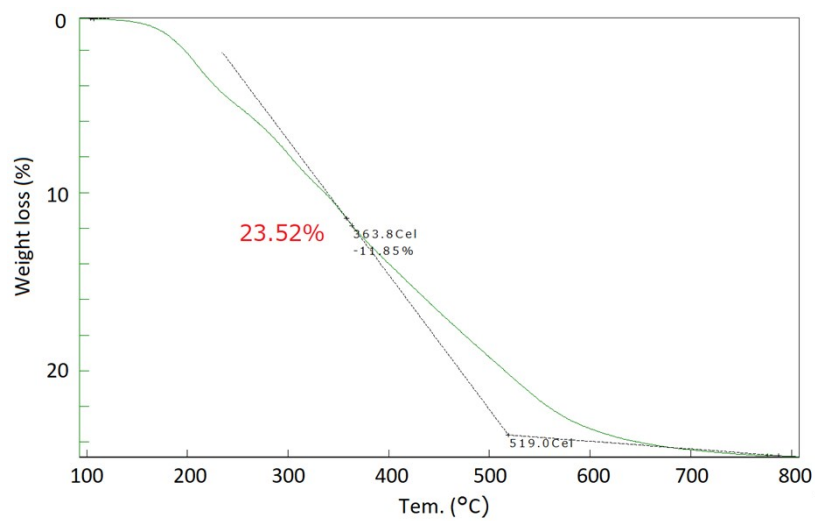

**Figure S6** TGA of TU-PMO.

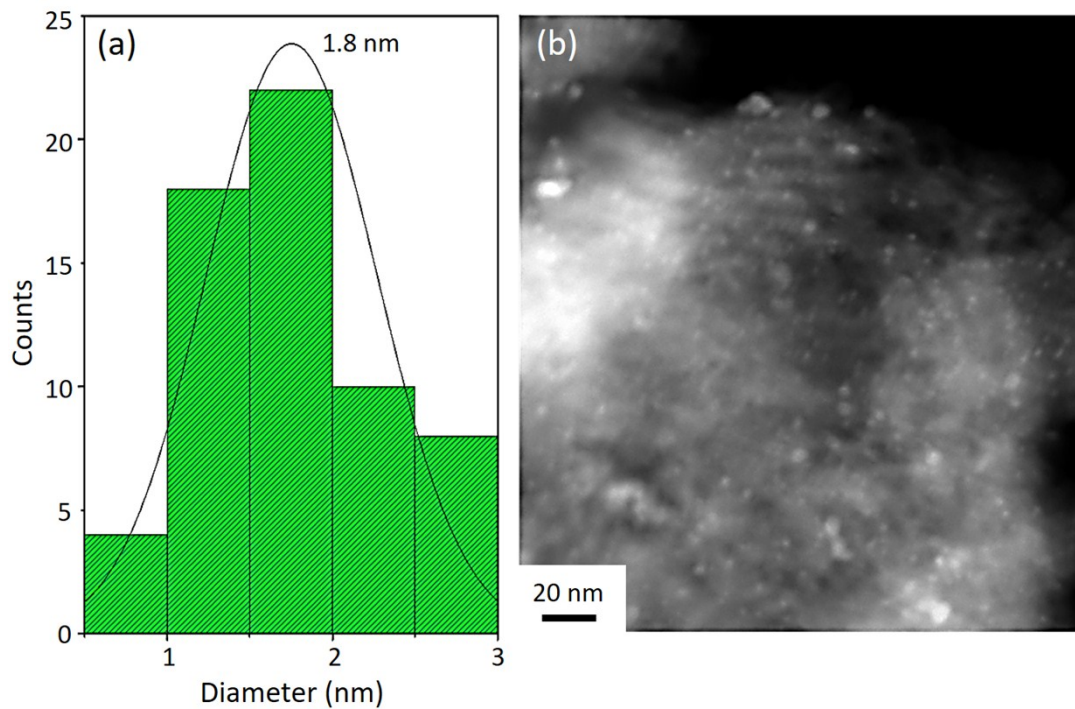

**Figure S7** (a) Particle size distribution of Pd nanoparticles in TU-PMO and (b) HADDF-STEM image.

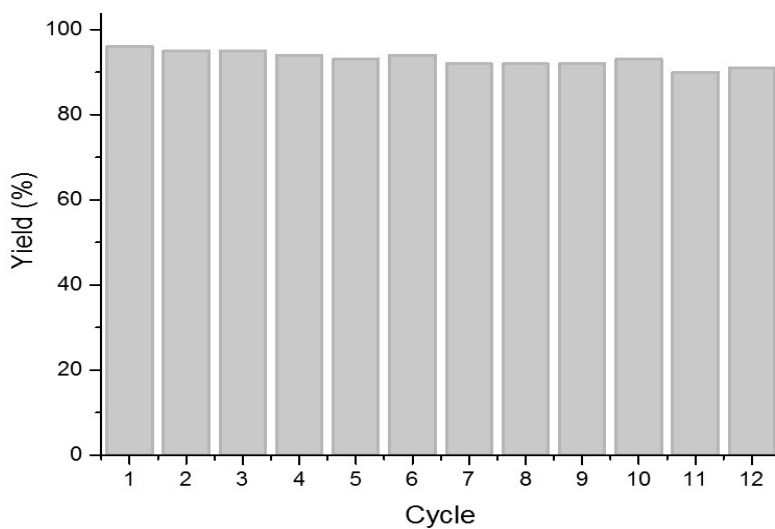

**Figure S8** Recyclability of Pd@TU-PMO catalyst in Suzuki-Miyaura coupling reaction of 4-bromoacetophenone and phenylboronic acid over 12 consecutive cycles.

**Table S1**

| <b>Sample</b> | <b>Pore diameter (nm)</b> | <b>Surface area (m<sup>2</sup> g<sup>-1</sup>)</b> | <b>V<sub>p</sub> (cm<sup>3</sup> g<sup>-1</sup>)</b> |
|---------------|---------------------------|----------------------------------------------------|------------------------------------------------------|
| TU-PMO        | 6.18                      | 410                                                | 1.22                                                 |
| Pd@TU-PMO     | 6.18                      | 405                                                | 1.11                                                 |

## Appendix:

**1-(3'-methyl-[1,1'-biphenyl]-4-yl)ethanone (Entry 11, 16, and 19):**<sup>R1</sup> <sup>1</sup>H NMR (300 MHz, CDCl<sub>3</sub>): δ = 2.45 (s, 3 H), 2.65 (s, 3 H), 7.22-8.04 (m, 8 H). <sup>13</sup>C NMR (75 MHz, CDCl<sub>3</sub>): δ = 197.8, 145.9, 139.8, 138.6, 135.9, 129.0, 128.9, 128.0, 127.2, 124.4, 26.7, 21.5.

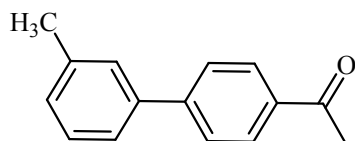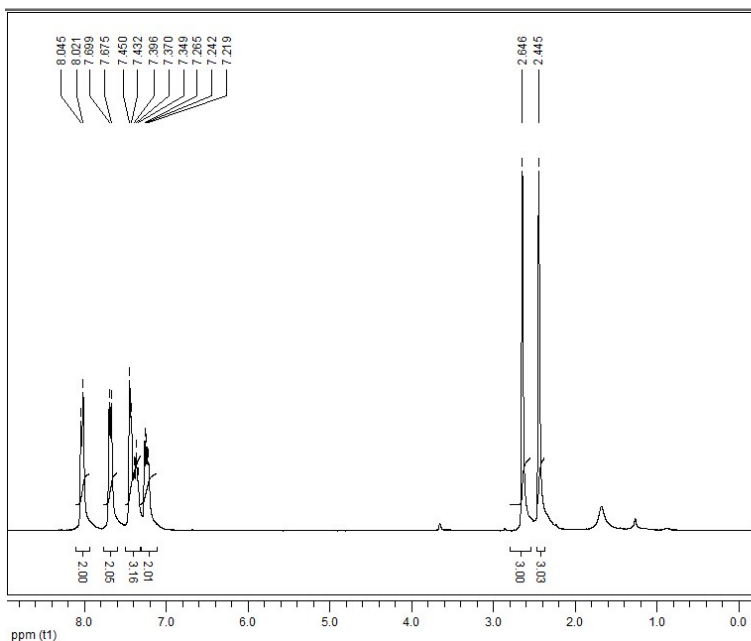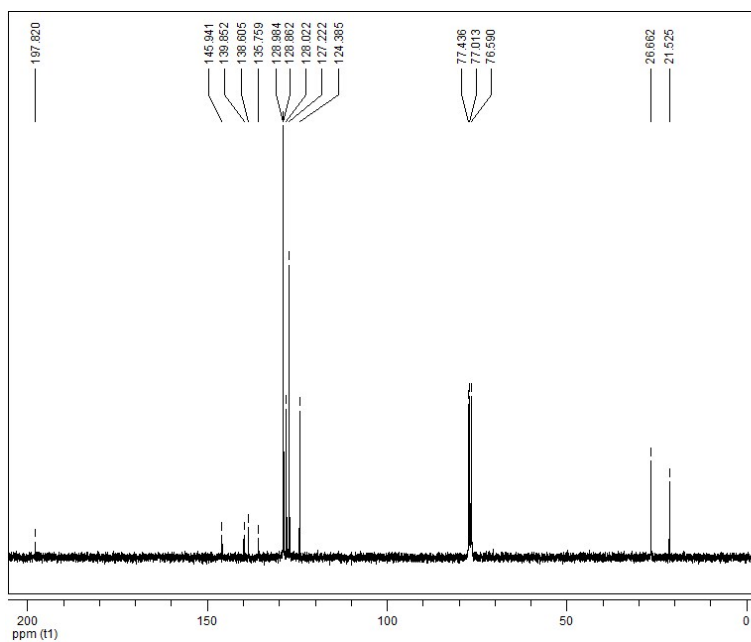

**2-Methoxybiphenyl (Entry 5):**<sup>R1</sup> White solid, mp: 89-91 °C. <sup>1</sup>H NMR (300 MHz, CDCl<sub>3</sub>): δ = 7.57-7.61 (m, 4 H), 7.44-7.48 (m, 2 H), 7.32-7.37 (m, 1 H), 7.01-7.04 (m, 2 H), 3.88 (s, 3 H); <sup>13</sup>CNMR (75 MHz, CDCl<sub>3</sub>): δ = 159.2, 140.9, 133.8, 128.7, 128.2, 126.8, 126.7, 114.2, 55.3.

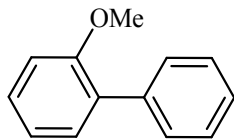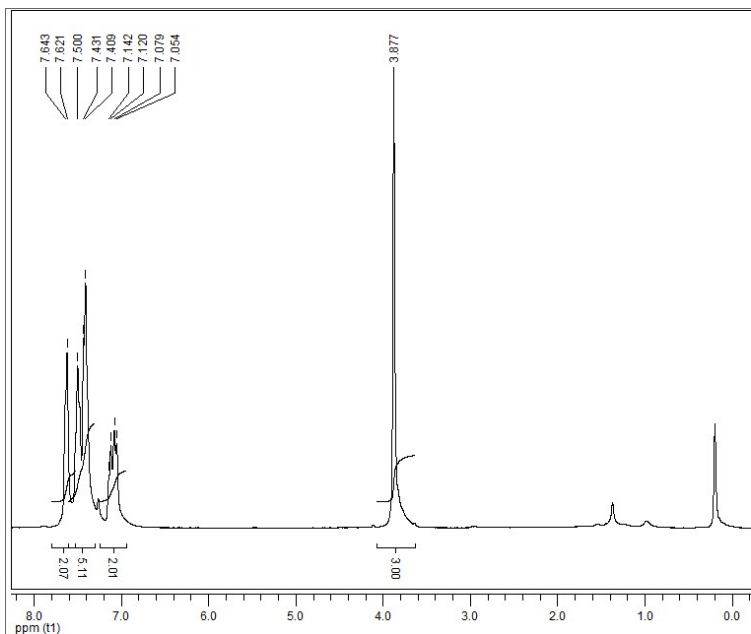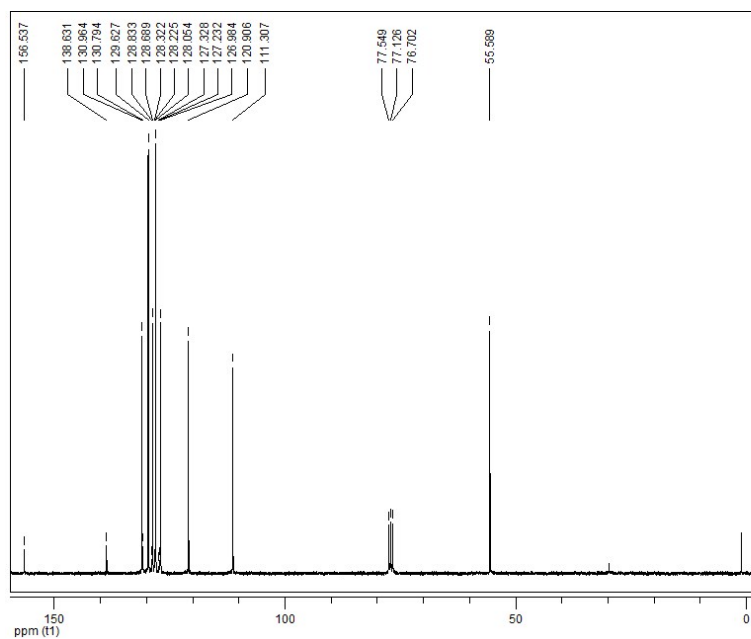

**4-Methoxybiphenyl (Entry 7):**<sup>R2</sup> White solid, mp: 89-91 °C. <sup>1</sup>H NMR (300 MHz, CDCl<sub>3</sub>): δ = 7.57-7.61 (m, 4 H), 7.44-7.48 (m, 2 H), 7.32-7.37 (m, 1 H), 7.01-7.04 (m, 2 H), 3.88 (s, 3 H); <sup>13</sup>CNMR (75 MHz, CDCl<sub>3</sub>): δ = 159.2, 140.9, 133.8, 128.7, 128.2, 126.8, 126.7, 114.2, 55.3.

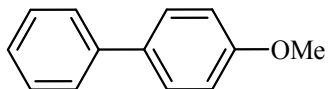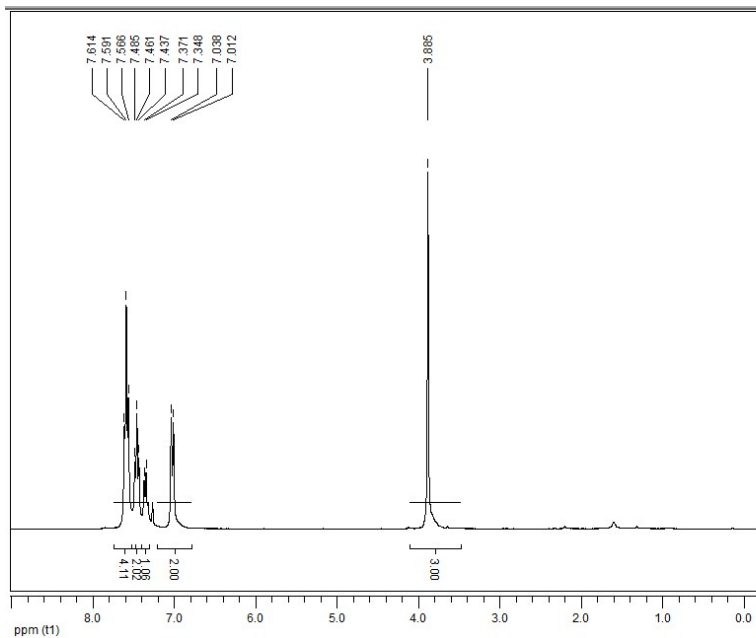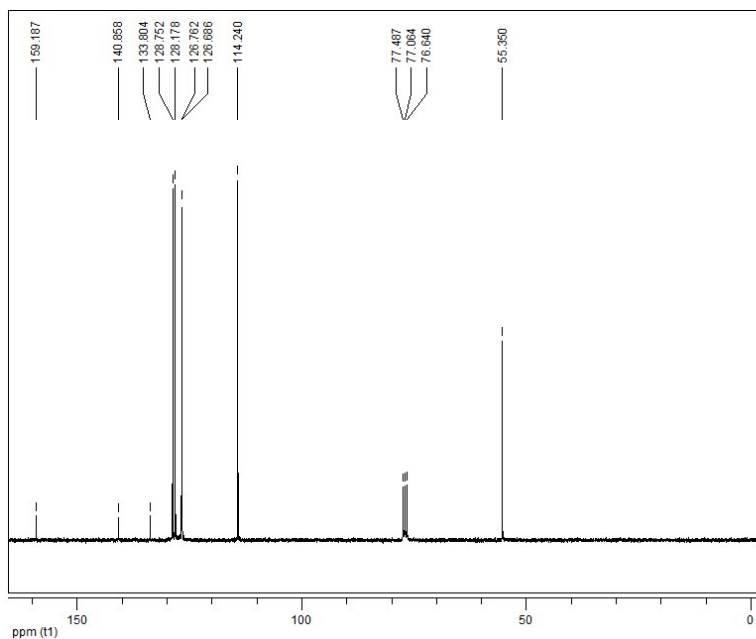



**3-Methyl-4'-methoxy-biphenyl (Entry 9):**<sup>R3</sup> Colorless oil. <sup>1</sup>H NMR (300 MHz, CDCl<sub>3</sub>): δ = 6.99-7.57 (m, 8 H), 3.87 (s, 3 H), 2.45 (s, 3 H). <sup>13</sup>C NMR (75MHz, CDCl<sub>3</sub>): δ = 159.1, 140.8, 138.3, 133.9, 128.7, 128.2, 127.6, 127.4, 123.9, 114.2, 55.3, 21.6.

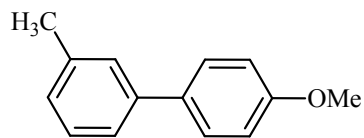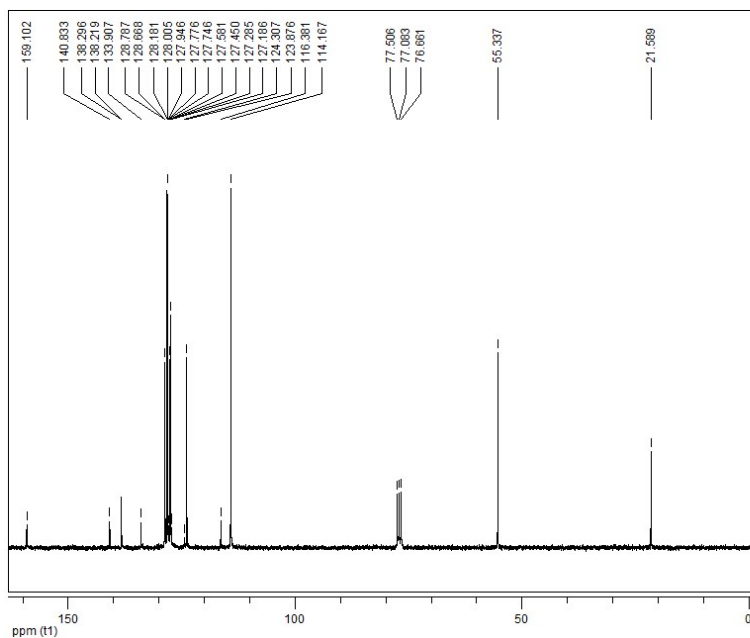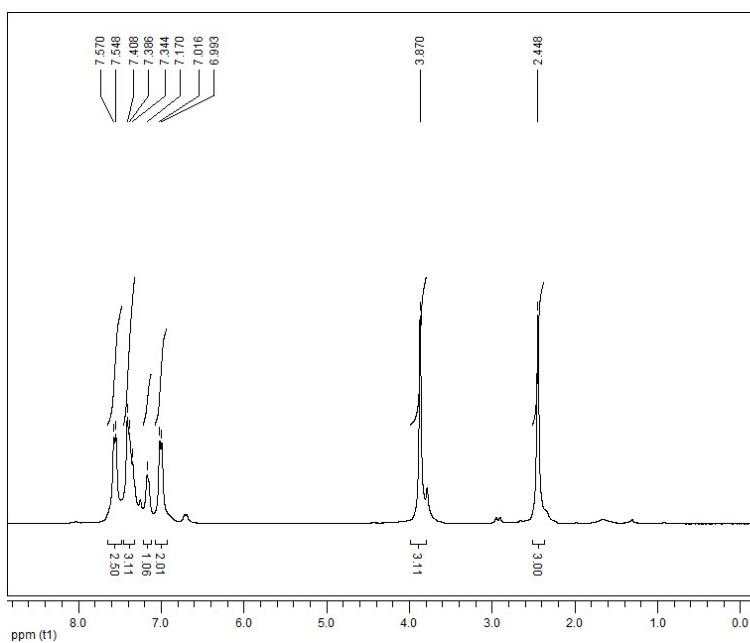

**1-Nitro-3-phenylbenzene (Entry 8):**  $^{13}\text{C}$  NMR (75 MHz,  $\text{CDCl}_3$ ):  $\delta = 148.71, 142.85, 138.65, 133.03, 129.7,$   
129.2, 128.6, 127.2, 122.0, 121.9.

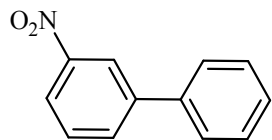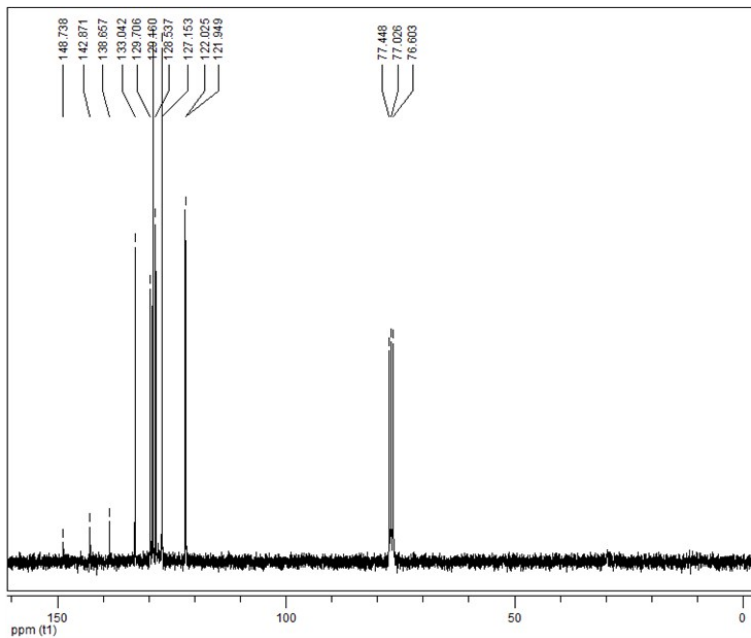

**Biphenyl (Entry 1 and 12):**<sup>R2</sup> White solid, mp: 45-47 °C. <sup>1</sup>H NMR (300 MHz, CDCl<sub>3</sub>): δ = 7.28-7.63 (m, Ar-H, 9 H), 2.44 (s, CH<sub>3</sub>, 3 H). <sup>13</sup>C NMR (75 MHz, CDCl<sub>3</sub>): δ = 141.2, 138.4, 137.0, 129.5, 128.7, 127.2, 127.0, 21.1.

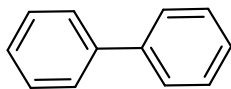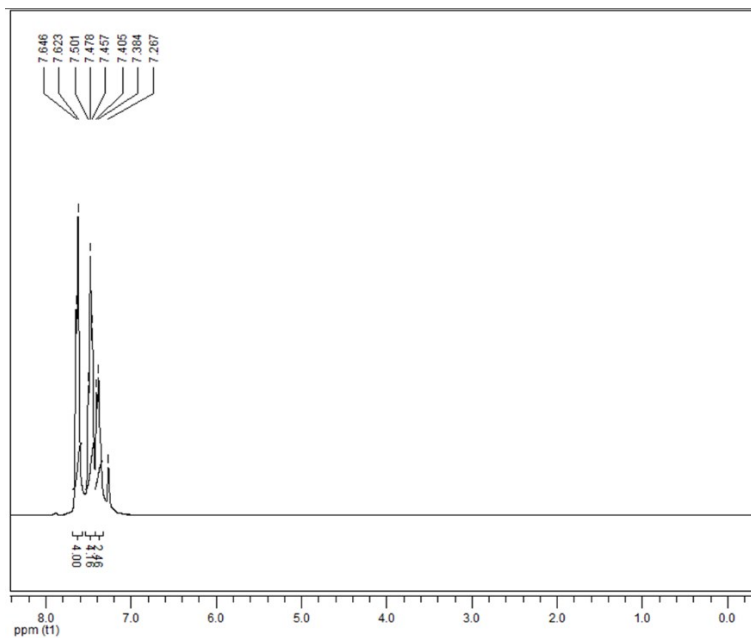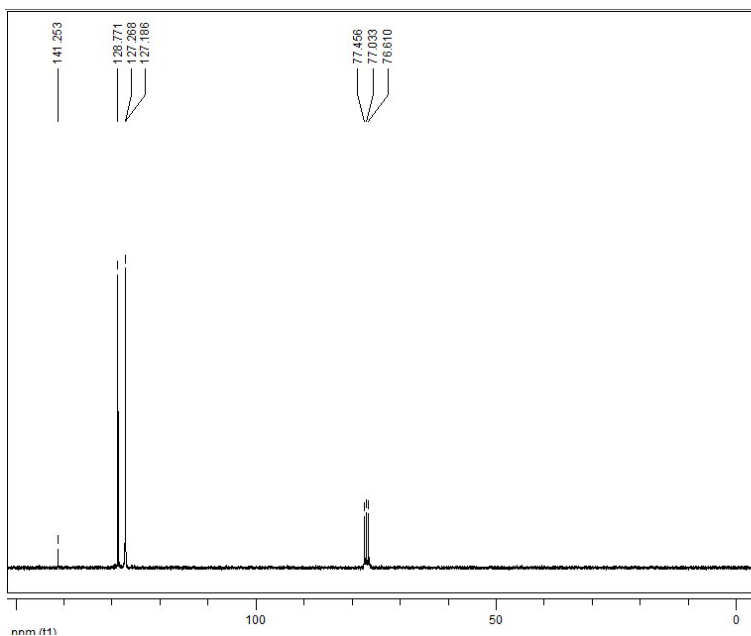

#### 4-Methylbiphenyl (Entry 2 and 4):<sup>R3</sup>

White solid, mp: 45-47 °C. <sup>1</sup>H NMR (300 MHz, CDCl<sub>3</sub>): δ = 7.28-7.63 (m, Ar-H, 9 H), 2.44 (s, CH<sub>3</sub>, 3 H). <sup>13</sup>C NMR (75 MHz, CDCl<sub>3</sub>): δ = 141.2, 138.4, 137.0, 129.5, 128.7, 127.23, 127.2, 127.0, 21.1.

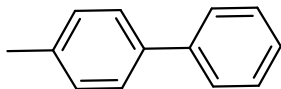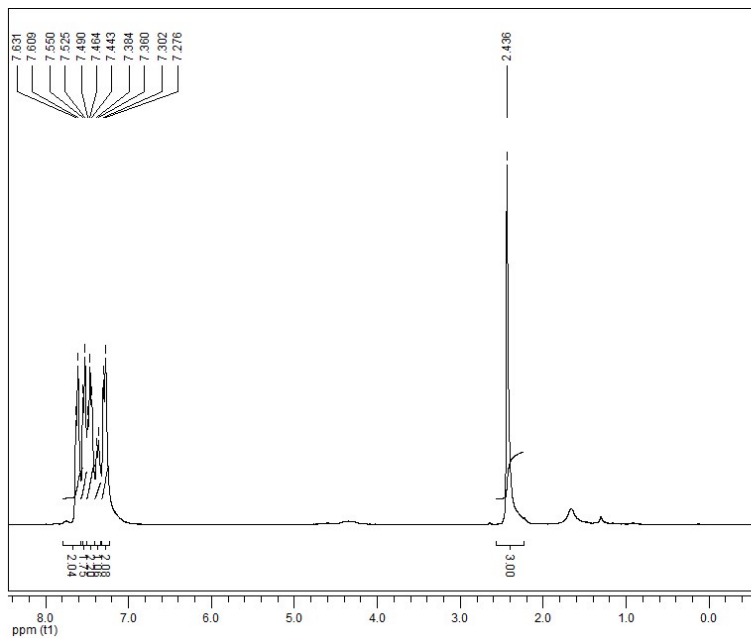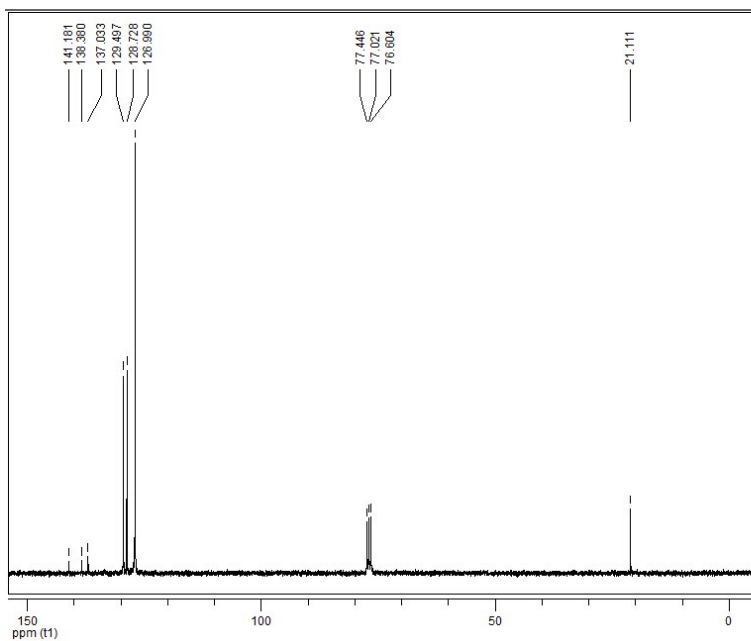

### 3-Phenylbenzaldehyde (Entry 13 and 18):<sup>R3</sup>

<sup>1</sup>H NMR (300 MHz, CDCl<sub>3</sub>): δ = 7.26-8.12 (m, 9 H), 10.10 (s, 1 H). <sup>13</sup>C NMR (75 MHz, CDCl<sub>3</sub>): δ = 192.4, 142.2, 136.9, 135.6, 133.1, 129.5, 129.0, 128.7, 128.2, 128.0, 127.1.

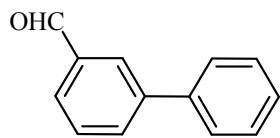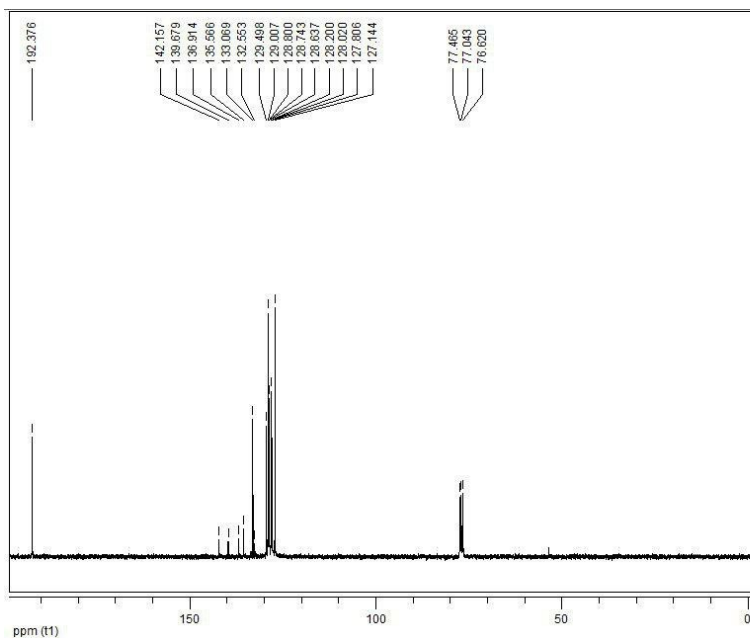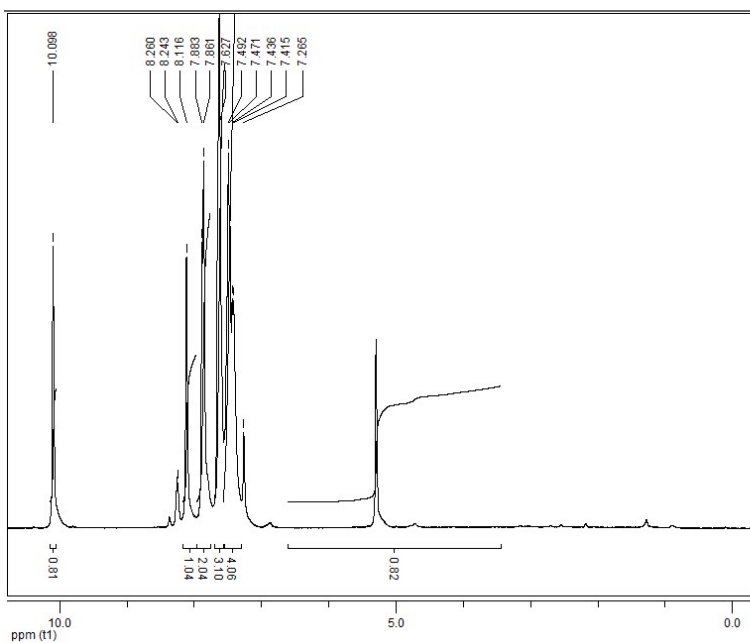

## 2-Methoxybiphenyl (Entry 3):<sup>R3</sup>

Colorless viscous liquid. <sup>13</sup>C NMR (75 MHz, CDCl<sub>3</sub>): δ = 156.6, 138.7, 131.0, 130.8, 129.6, 128.8, 128.0, 127.0, 120.9, 111.3, 55.6.

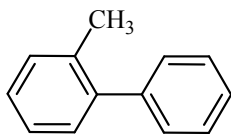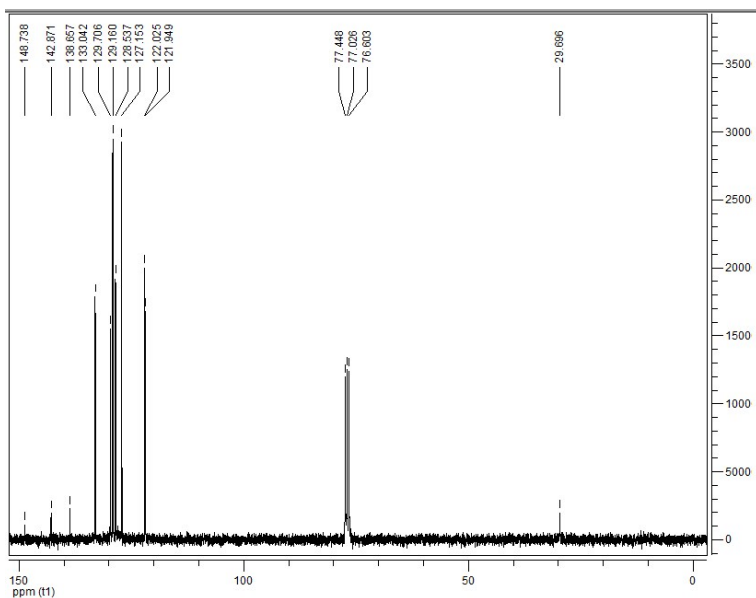

**4'-methyl-3-nitro-1,1'-biphenyl (Entry 15):**  $^{13}\text{C}$ -NMR ( $\text{CDCl}_3$ , 75 MHz):  $\delta = 22.7, 122.1, 123.3, 128.3, 129.0, 130.1, 130.3, 133.0, 139.0, 140.4, 148.9$ .

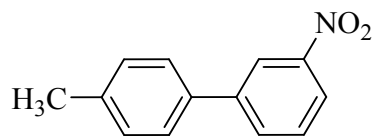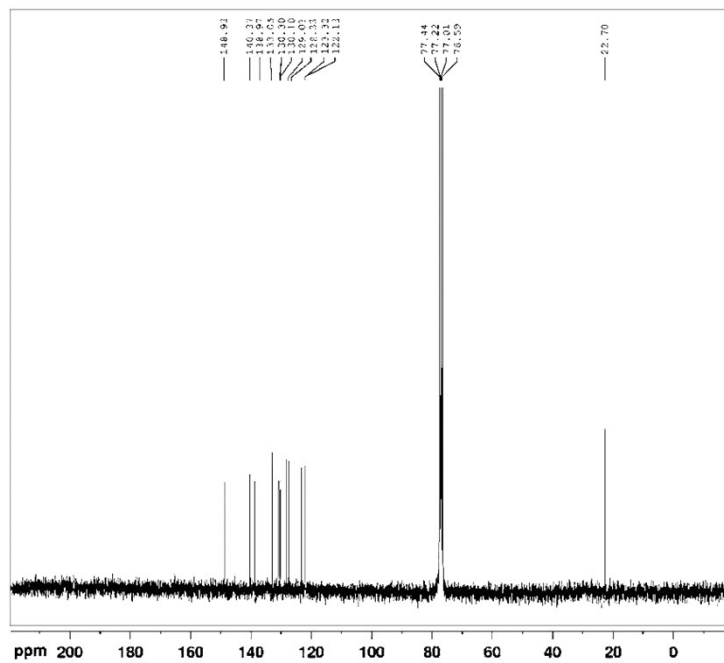

**3-Methyl-2'-methoxy-biphenyl (Entry 6 and 14):**<sup>R3</sup> Colorless oil. <sup>1</sup>H NMR (300 MHz, CDCl<sub>3</sub>) : δ = 7.00-7.36 (m, 8 H), 3.84 (s, 3 H), 2.44 (s, 3 H). <sup>13</sup>C NMR (75MHz, CDCl<sub>3</sub>): δ = 156.5, 139.5, 138.5, 137.52, 130.9, 130.2, 128.5, 127.9, 127.7, 126.7, 120.7, 111.1, 55.5, 21.6.

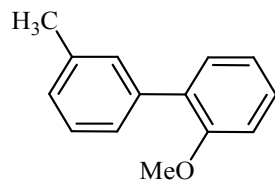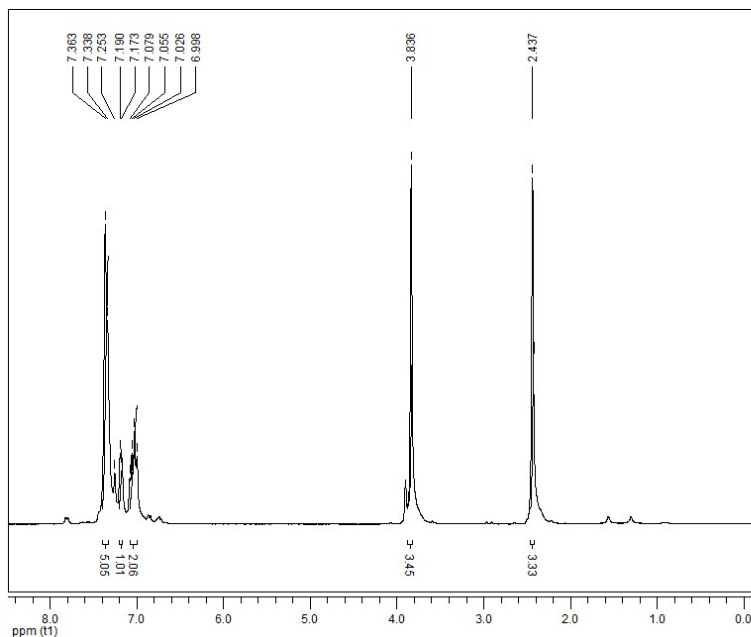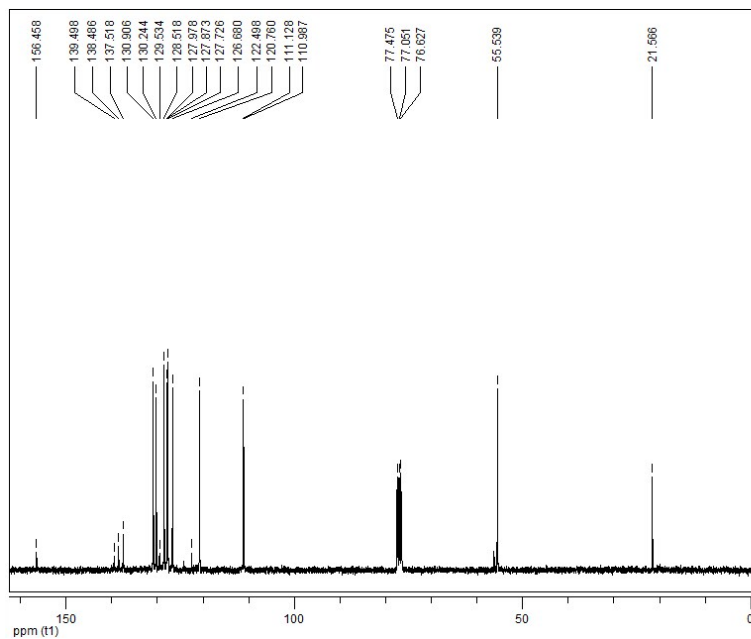



**1-Biphenyl-4-yl-ethanone (Entry 17 and 10):**<sup>R3</sup> White solid, mp: 121-123 °C. <sup>1</sup>H NMR (300 MHz, CDCl<sub>3</sub>): δ = 8.03-8.06 (m, 2 H), 7.63-7.78 (m, 4 H), 7.41-7.50 (m, 3 H), 2.65 (s, 3 H). <sup>13</sup>C NMR (75 MHz, CDCl<sub>3</sub>): δ = 197.8, 145.8, 139.9, 135.8, 128.9, 128.9, 128.2, 127.3, 127.2, 26.6.

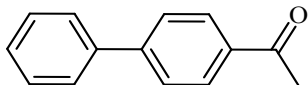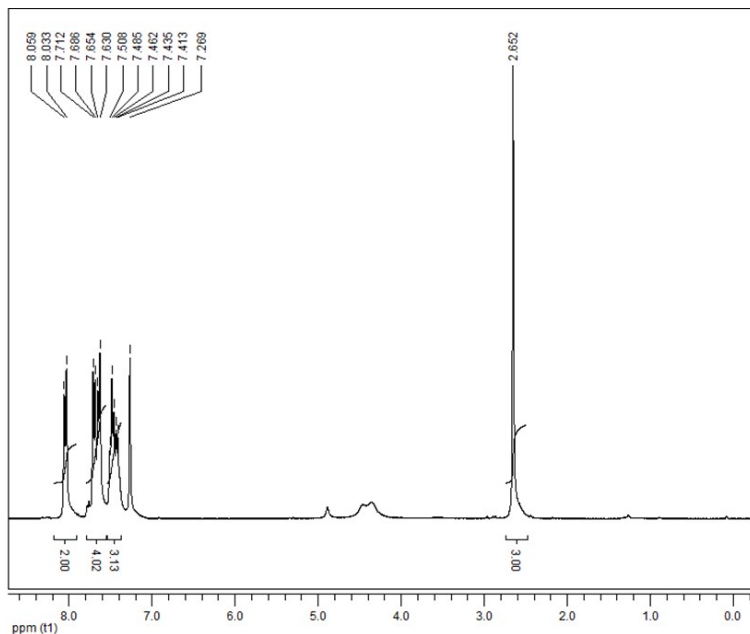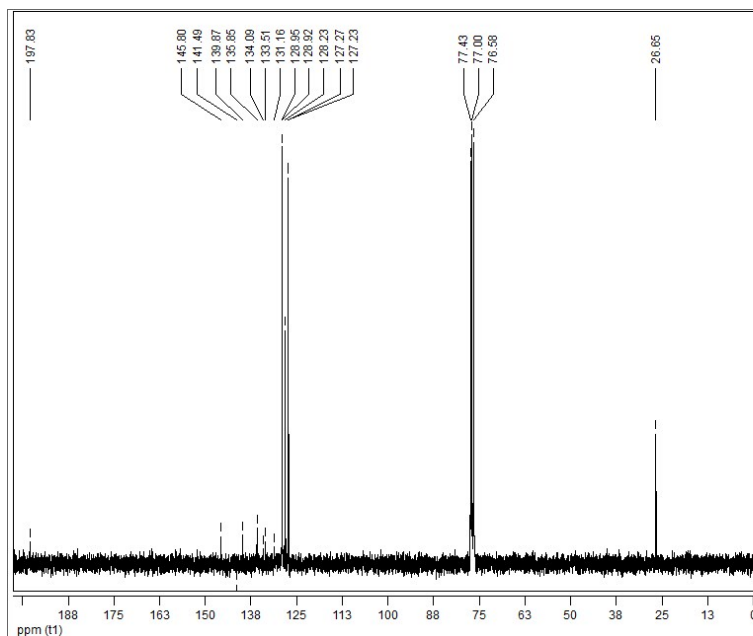

## Reference

- R1 E. Doustkhah, S. Rostamnia, H. G. Hossieni and R. Luque, *ChemistrySelect*, **2017**, 2, 329.  
 R2 S. Rostamnia, E. Doustkhah and B. Zeynizadeh, *Microporous Mesoporous Mater.*, **2016**, 222, 87.  
 R3 S. Rostamnia and H. Xin, *Appl. Organomet. Chem.*, **2013**, 27, 348.
